# Supplementary material
Source: PubMed Central journal article supplement (PMC6124519)
Supplement: jciinsight-3-95319-s075.pdf [file jciinsight-3-95319-s075.pdf]

## SUPPLEMENTARY FIGURES AND TABLES

### Elderly human hematopoietic progenitor cells express cellular senescence markers and are more susceptible to pyroptosis

FALI et al.

**Fig. S1. Phenotypic characterization of common lymphoid progenitors *in vitro***

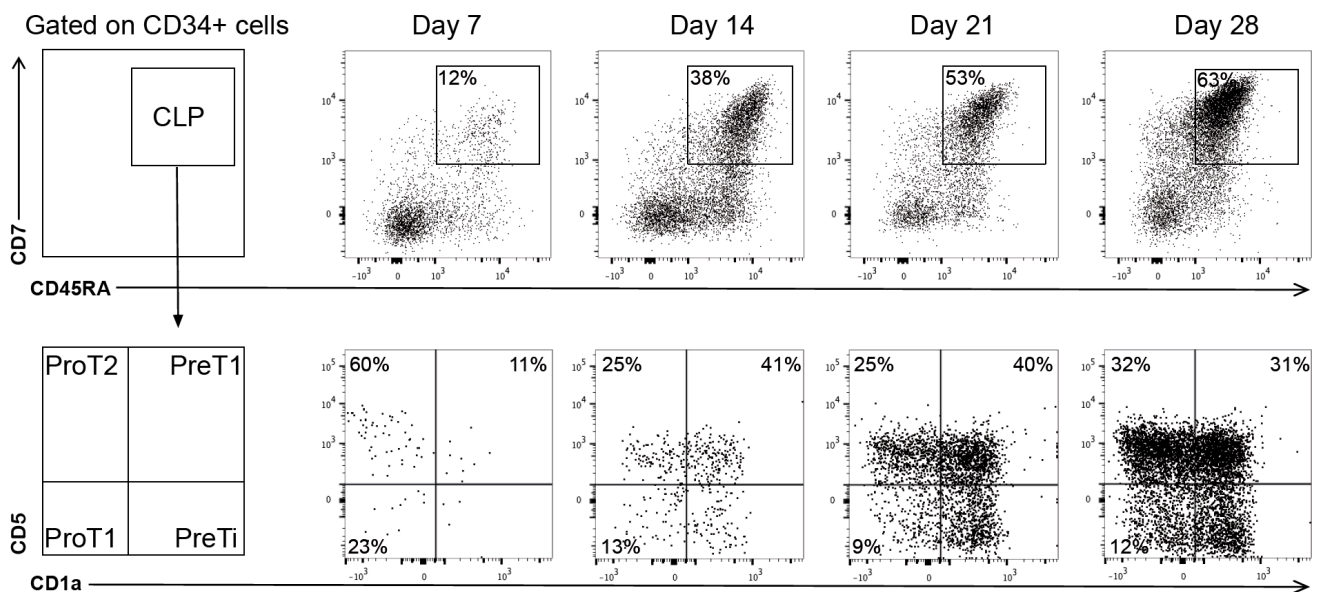

Identification and phenotyping of common lymphoid progenitors (CLP) differentiated *in vitro* from CD34<sup>+</sup> cells after 7, 14, 21 and 28 days in the OP9-DL1 culture system. T lymphocyte differentiation subsets were defined as ProT1: CD45RA<sup>+</sup> CD7<sup>+</sup> CD5<sup>-</sup> CD1a<sup>-</sup>; ProT2: CD45RA<sup>+</sup> CD7<sup>+</sup> CD5<sup>+</sup> CD1a<sup>-</sup>; PreTimmature: CD45RA<sup>+</sup> CD7<sup>+</sup> CD5<sup>-</sup> CD1a<sup>+</sup>; and PreT1: CD45RA<sup>+</sup> CD7<sup>+</sup> CD5<sup>+</sup> CD1a<sup>+</sup>. Numbers indicate percentages of cells within the different quadrants.

**Fig. S2. Transcriptional profiling and clustering of CD34<sup>+</sup> hematopoietic progenitors from subjects with different age.**

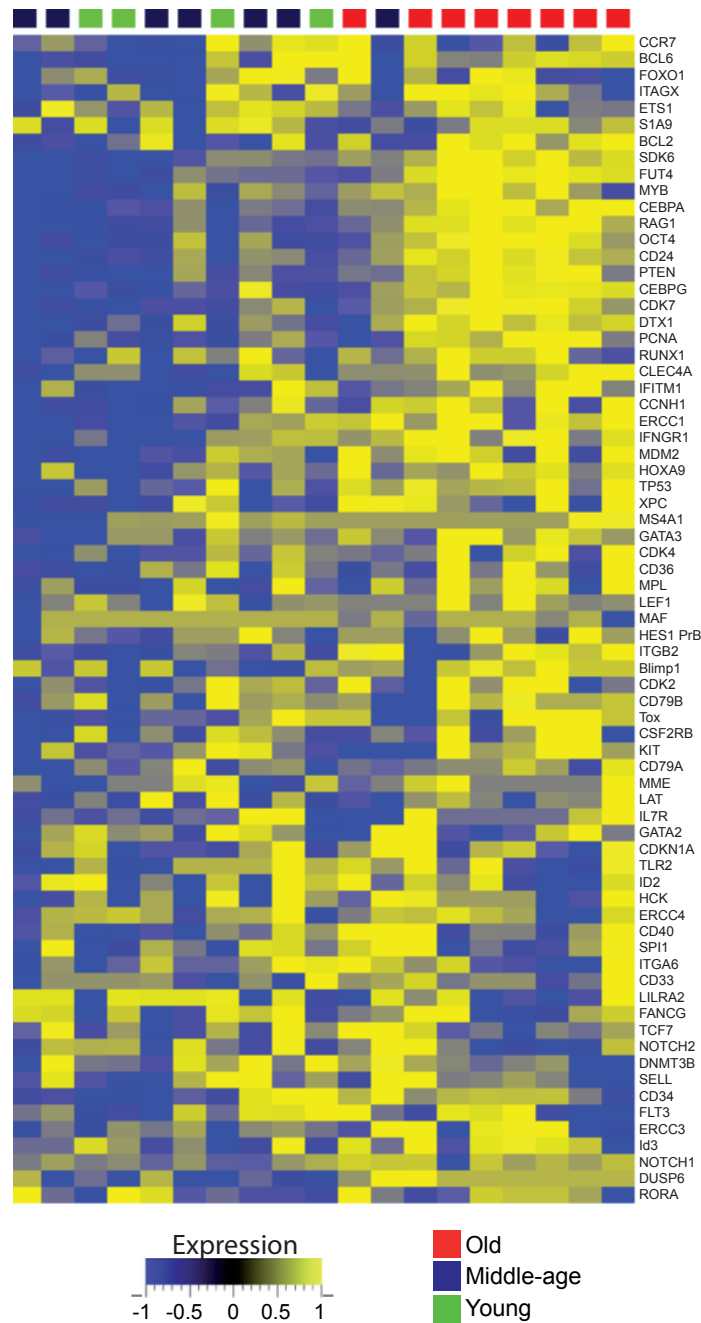

Heat map representation of the transcriptional signature for HPC from young (Y, n=4), middle aged (M, n=7) or old (O, n=8) healthy adults. The expression of 80 selected genes in CD34<sup>+</sup> CD45<sup>low</sup> Lin<sup>-</sup> cells, FACS sorted *ex vivo* from donor PBMC, was assessed using Fluidigm microfluidics system.

**Fig. S3. Metabolic properties of circulating CD34<sup>+</sup> cells**

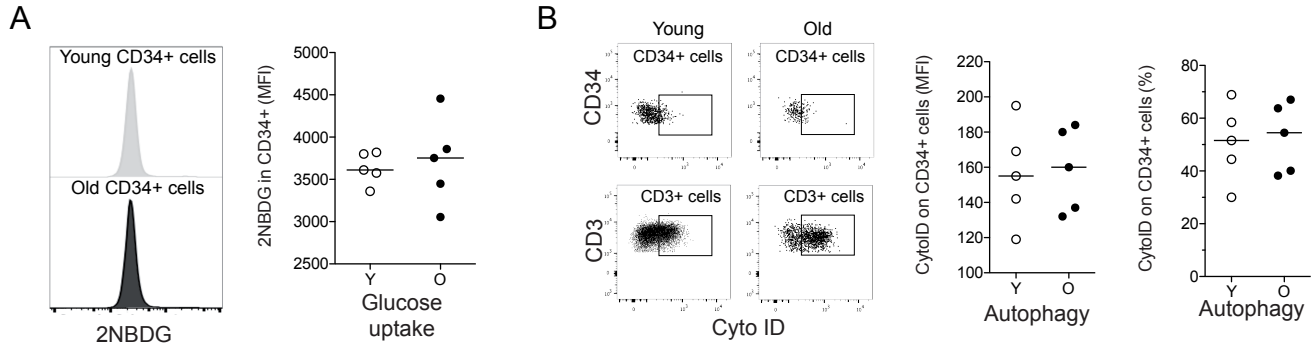

**(A)** Representative staining and MFI levels for 2NBDG (i.e. glucose fluorescent substitute) uptake in CD34<sup>+</sup> cells from young (n=5) or old (n=5) adult PBMC. **(B)** Representative staining in CD34<sup>+</sup> or CD3<sup>+</sup> cells and MFI levels for Cyto ID (i.e. autophagy marker) in CD34<sup>+</sup> cells from young (n=5) or old (n=5) adult PBMC. Bars represent the median.

**Fig. S4. Telomere attrition in elderly CD34<sup>+</sup> hematopoietic progenitors**

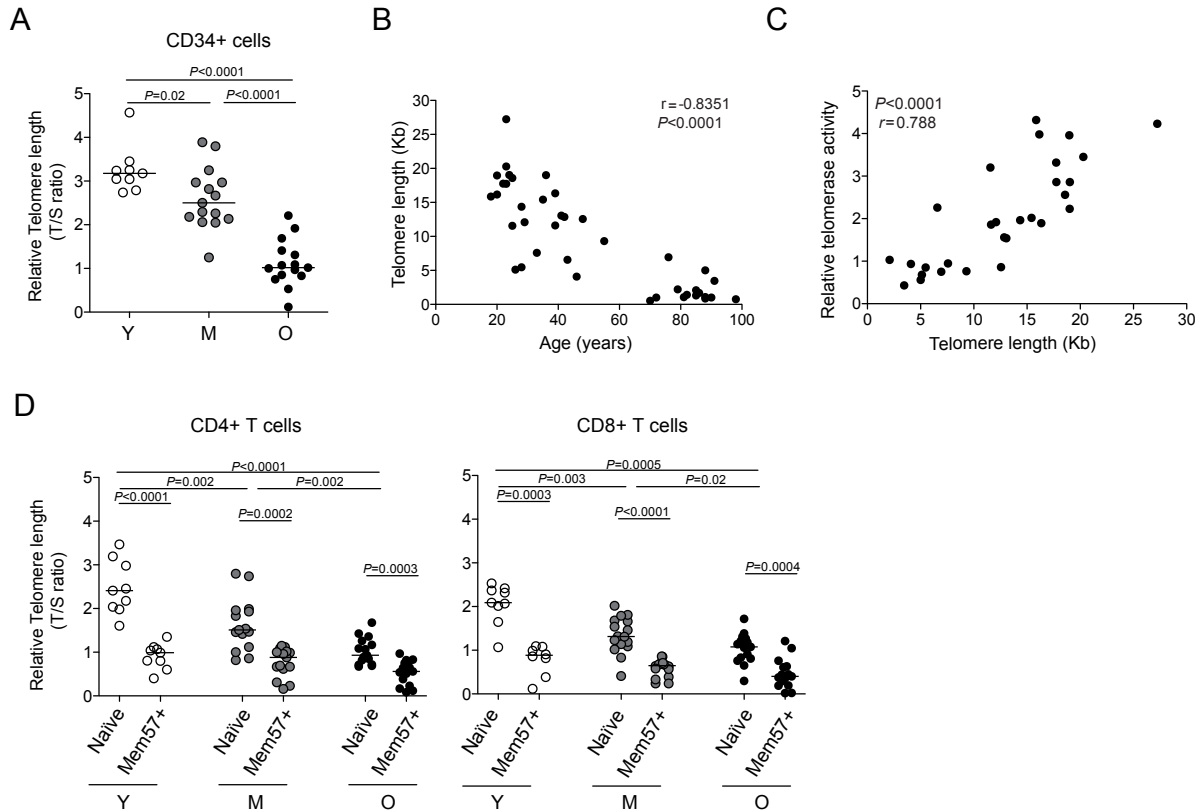

Relative telomere length in **(A)** CD34<sup>+</sup> HPC from young (Y, n=9), middle aged (M, n=15) or old (O, n=14) healthy adults. Telomere length was measured by qPCR in FACS sorted cells from PBMC, and is expressed as T/S ratio (T: telomere and S: single gene copy). **(B)** Correlation between CLP telomere length and age of donors. **(C)** Correlations between telomere length or telomerase activity of CLP. The Spearman's rank test was used to determine correlations. **(D)** Relative telomere length in naïve or senescent CD57<sup>+</sup> memory CD4<sup>+</sup> or CD8<sup>+</sup> T cells from young (Y, n=9), middle aged (M, n=15) or old (O, n=14) healthy adults. Bars indicate the median. The Mann-Whitney test was used for group comparison.

**Fig. S5. Assessment of CD34<sup>+</sup> cell death using Annexin V and Propidium iodide staining**

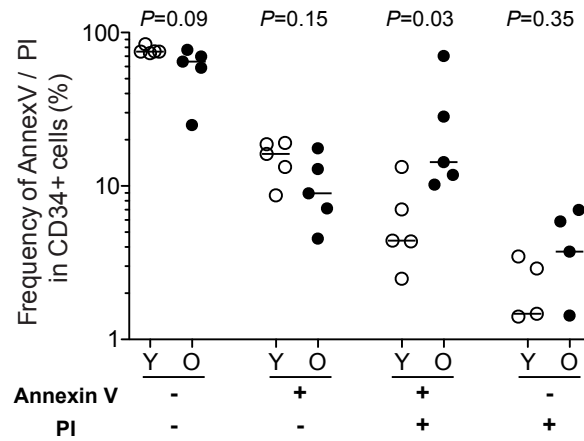

Staining levels for Annexin V and PI in CD34<sup>+</sup> cells from young (open circles) or old (black circles) adult PBMC. Percentages of cells Annexin V -/+ and PI -/+ within CD34<sup>+</sup> cells are shown. The Mann-Whitney test was used for comparison. Bars indicate the median.

**Table S1. Genes and primers selected for the transcriptional study of CD34<sup>+</sup> hematopoietic progenitors from old humans**

| GeneName       | Gene description                                              | Ref. ID       |
|----------------|---------------------------------------------------------------|---------------|
| <b>PTEN</b>    | Phosphatase And Tension Homolog                               | Hs03673482_s1 |
| <b>CEBP</b>    | CCAAT/Enhancer Binding Protein Gamma                          | Hs01922818_s1 |
| <b>CDK7</b>    | Cyclin Dependent Kinase 7                                     | Hs00361486_m1 |
| <b>RAG1</b>    | Recombination Activating 1                                    | Hs00172121_m1 |
| <b>POU5F1</b>  | POU Class 5 Homeobox 1                                        | Hs00999632_g1 |
| <b>CD24</b>    | CD24 Molecule                                                 | Hs02379687_s1 |
| <b>CEBPA</b>   | CCAAT/Enhancer Binding Protein Alpha                          | Hs00269972_s1 |
| <b>DTX1</b>    | Deltex E3 Ubiquitin Ligase 1                                  | Hs01092201_m1 |
| <b>FUT4</b>    | Fucosyltransferase 4                                          | Hs00275643_s1 |
| <b>CDK6</b>    | Cyclin Dependent Kinase 6                                     | Hs01026371_m1 |
| <b>MYB</b>     | MYB Proto-Oncogene, Transcription Factor                      | Hs00920554_m1 |
| <b>PCNA</b>    | Proliferating Cell Nuclear Antigen                            | Hs00696862_m1 |
| <b>RUNXL</b>   | Runt Related Transcription Factor 1                           | Hs00231079_m1 |
| <b>CLEC4A</b>  | C-Type Lectin Domain Family 4 Member A                        | Hs01087625_m1 |
| <b>IFITM1</b>  | interferon induced Transmembrane Protein 1                    | Hs00705137_s1 |
| <b>p53</b>     | Tumor Protein P53                                             | Hs01034249_m1 |
| <b>HOXA9</b>   | Homeobox A9                                                   | Hs00365956_m1 |
| <b>MDM2</b>    | MDM2 Proto-Oncogene                                           | Hs01066942_m1 |
| <b>ERCC1</b>   | ERCC Excision Repair 1, Endonuclease Non-Catalytic Subunit    | Hs00157415_m1 |
| <b>CCNH</b>    | Cyclin H                                                      | Hs01025418_m1 |
| <b>IFNGR1</b>  | Interferon Gamma Receptor 1                                   | Hs00166223_m1 |
| <b>XPC</b>     | XPC Complex Subunit, DNA Damage Recognition And Repair Factor | Hs01104206_m1 |
| <b>MS4A1</b>   | Membrane Spanning 4-Domains A1                                | Hs00544818_m1 |
| <b>GATA3</b>   | GATA binding Protein 3                                        | Hs00231122_m1 |
| <b>CDK4</b>    | Cyclin Dependent Kinase 4                                     | Hs00175935_m1 |
| <b>CD36</b>    | CD36 Molecule                                                 | Hs00169627_m1 |
| <b>C-MPL</b>   | MPL Proto-Oncogene, Thrombopoietin Receptor                   | Hs00180489_m1 |
| <b>LEF1</b>    | Lymphoid Enhancer Binding Factor 1                            | Hs01547250_m1 |
| <b>MAF</b>     | MAF BZIP Transcription Factor                                 | Hs00193519_m1 |
| <b>HES-1</b>   | Hes Family BHLH Transcription Factor1                         | Hs01118948_g1 |
| <b>ITGB2</b>   | Integrin subunit Beta 2                                       | Hs00164957_m1 |
| <b>Blimp-1</b> | Beta-Interferon Gene Positive regulating Domain I             | Hs00153357_m1 |
| <b>CDK2</b>    | Cyclin dependent Kinase 2                                     | Hs00608087_g1 |
| <b>CD79B</b>   | CD79b Molecule                                                | Hs00236881_m1 |
| <b>Tox</b>     | Thymocyte Selection Associated High Mobility Group Box        | Hs01049522_m1 |
| <b>CSF2RB</b>  | Colony Stimulating Factor 2 Receptor Beta Common Subunit      | Hs00166144_m1 |
| <b>KIT</b>     | Kit Proto-Ocogene Receptro Tyrosine Kinase                    | Hs00174029_m1 |
| <b>CD79A</b>   | CD79a Molecule                                                | Hs00233566_m1 |
| <b>MME</b>     | Memebrane metalloendopeptidase                                | Hs00153510_m1 |
| <b>LAT</b>     | Linker For Activation Of T-Cells                              | Hs00175561_m1 |
| <b>Foxo1</b>   | Forkhead Box O1                                               | Hs01054576_m1 |
| <b>ITGAX</b>   | Integrin subunit Alpha X                                      | Hs01015064_m1 |
| <b>CCR7</b>    | C-C Motif Chemokine Receptor 7                                | Hs99999080_m1 |
| <b>BCL6</b>    | B-Cell CLL/Lymphoma 6                                         | Hs00277037_m1 |
| <b>ETS1</b>    | ETS Proto-Ocogene 1, Transcription Factor                     | Hs00428293_m1 |
| <b>S1A9</b>    | S100 Calcium Binding Protein A9                               | Hs00610058_m1 |
| <b>BCL2</b>    | BCL2, Apoptosis Regulator                                     | Hs99999018_m1 |
| <b>L7R</b>     | Interleukin 7 Receptor                                        | Hs00233682_m1 |
| <b>GATA2</b>   | GATA Binding Protein 2                                        | Hs00231119_m1 |
| <b>ID2</b>     | Inhibitor of DNA Binding 2, HLH Protein                       | Hs04187239_m1 |
| <b>HCK</b>     | HCK Proto-Oncogene, Src Family Tyrosine Kinase                | Hs00176654_m1 |
| <b>TLR2</b>    | Toll Like Receptor 2                                          | Hs01014511_m1 |
| <b>CDKN1A</b>  | Cyclin Dependent Kinase inhibitor 1A                          | Hs00355782_m1 |
| <b>ERCC4</b>   | ERCC Excision Repair 4, Endonuclease Catalytic Subunit        | Hs00193342_m1 |
| <b>CD40</b>    | Cd40 Molecule                                                 | Hs00374176_m1 |
| <b>SPI1</b>    | Hematopoietic Transcription Factor PU.1                       | Hs02786711_m1 |
| <b>ITGA6</b>   | Intergrin Subunit Alpha 6                                     | Hs01041011_m1 |
| <b>CD33</b>    | CD33 Molecule                                                 | Hs01076281_m1 |
| <b>LILRA2</b>  | Leukocyte Immunoglobulin Like Receptor A2                     | Hs00429044_m1 |
| <b>FANCG</b>   | Fanconi Anemia Complementation Group G                        | Hs00922010_g1 |
| <b>TCF7</b>    | Transcription Factor 7 (T-Cell Specific, HMG-Box)             | Rh02844810_m1 |
| <b>NOTCH2</b>  | Neurogenic Locus Notch Homolog Protein 2                      | Rh02881159_m1 |
| <b>DNMT3B</b>  | DNA Methyltransferase 3 Beta                                  | Hs01003402_m1 |
| <b>SELL</b>    | Selectin L (Leukocyte Adhesion Molecule)                      | Hs00174151_m1 |
| <b>CD34</b>    | CD34 Molecule                                                 | Hs00990732_m1 |
| <b>FLT3</b>    | Fms Related Tyrosine Kinase 3                                 | Hs00975664_m1 |
| <b>ERCC3</b>   | ERCC Excision Repair 3, TFIIH Core Helicase Subunit           | Hs01554457_m1 |
| <b>ID3</b>     | Inhibitor of DNA Binding 3, HLH Protein                       | Hs00954037_g1 |
| <b>NOTCH1</b>  | Neurogenic Locus Notch Homolog Protein 1                      | Hs01062014_m1 |
| <b>DUSP6</b>   | Dual Specificity Phosphatase 6                                | Hs01044001_m1 |
| <b>RORA</b>    | RAR Related Orphan Receptor A                                 | Hs00536545_m1 |

**Table S2. Differentially upregulated genes in CD34<sup>+</sup> hematopoietic progenitors from old humans**

| GeneName        | Gene description                                           | Y Avg FC | M Avg FC | O Avg FC | p-values |
|-----------------|------------------------------------------------------------|----------|----------|----------|----------|
| CEBPa           | CCAAT/Enhancer Binding Protein Alpha                       | -2,4196  | -1,3885  | 0,2285   | 0,0002   |
| RAG1            | Recombination Activating 1                                 | -1,1240  | -0,6129  | 1,1154   | 0,0003   |
| CDK6            | Cyclin Dependent Kinase 6                                  | 2,0593   | 1,9882   | 2,9737   | 0,0008   |
| CDK7            | Cyclin Dependent Kinase 7                                  | -0,6813  | -0,1469  | 0,6877   | 0,0010   |
| CD15 (FUT4)     | Fucosyltransferase 4                                       | -2,1527  | -2,2744  | -0,3035  | 0,0014   |
| Oct4 (POU5F1)   | POU Class 5 Homeobox 1                                     | 0,5381   | 1,1793   | 2,4558   | 0,0014   |
| PTEN            | Phosphatase And Tension Homolog                            | 2,0877   | 2,2631   | 3,3953   | 0,0018   |
| CD24            | CD24 Molecule                                              | -3,0528  | -2,1376  | -0,5343  | 0,0028   |
| C/EBP (Cebpg)   | CCAAT/Enhancer Binding Protein Gamma                       | 1,5319   | 1,5435   | 2,5918   | 0,0089   |
| MDM2            | MDM2 Proto-Oncogene                                        | 0,6185   | 0,8767   | 1,4578   | 0,0153   |
| CD11c (ITGAX)   | Integrin subunit Alpha X                                   | -4,2033  | -7,6045  | -3,7764  | 0,0184   |
| PCNA            | Proliferating Cell Nuclear Antigen                         | -2,8843  | -3,1070  | -1,8585  | 0,0189   |
| CLEC4A          | C-Type Lectin Domain Family 4 Member A                     | -5,4330  | -4,6949  | -3,6966  | 0,0199   |
| IFNGR1          | Interferon Gamma Receptor 1                                | -1,5483  | -1,8931  | -0,9983  | 0,0204   |
| p53             | Tumor Protein P53                                          | 1,4414   | 1,1994   | 1,7966   | 0,0211   |
| BCL2            | BCL2, Apoptosis Regulator                                  | -4,8703  | -4,8892  | -3,6456  | 0,0218   |
| C-MYB (v-myb)   | MYB Proto-Oncogene, Transcription Factor                   | 1,9033   | 1,9980   | 2,8030   | 0,0225   |
| HOXA9           | Homeobox A9                                                | -1,9430  | -1,8006  | -1,2293  | 0,0290   |
| DUSP6           | Dual Specificity Phosphatase 6                             | -3,9821  | -3,4279  | -2,2305  | 0,0291   |
| ERCC1           | ERCC Excision Repair 1, Endonuclease Non-Catalytic Subunit | -0,2441  | -0,2287  | 0,4640   | 0,0302   |
| Deltex-1 (DTX1) | Deltex E3 Ubiquitin Ligase 1                               | -6,3014  | -6,1170  | -4,4440  | 0,0405   |

Statistically significant upregulation of genes in CD34<sup>+</sup> HPC from elderly people compared to young and middle age individuals. Multigroup comparison was performed using the Anova test of the Qlucore Omics explorer software.

**Table S3. Primers and probes used in RTqPCR**

| <b>Gene Name</b>    | <b>Primer Forward (5'→ 3')</b> | <b>Primer reverse (5'→ 3')</b> |
|---------------------|--------------------------------|--------------------------------|
| <i>TCF7</i>         | AGCCAGAAGCAAGTTCACAGG          | GCCTCCTTCTCTGCCTTGGAC          |
| <i>LEF1</i>         | GATCACACCCGTCACACATC           | ACCCGGAGACAAGGGATAAA           |
| <i>FZD3</i>         | CCTTGAGGATGTGCCAAGAT           | GAAATCCCGAGAACAATCCA           |
| <i>mTOR</i>         | TTGAGGTTGCTATGACCAGAGAGAA      | TTACCAGAAAGGACACCAGCCAATG      |
| <i>P70-S6K</i>      | GGAGCCTGGGAGCCCTGATGTA         | GAAGCCCTCTTTGATGCTGTCC         |
| <i>CLPP</i>         | GGCCAAGCCACAGACATT             | AGAGCTGCTTCTTGAGCTTCAT         |
| <i>CLPX</i>         | GGTGCTTTCAATGGTTTAGACAG        | GATGGTGTTCCAAATCCAAGA          |
| <i>LON</i>          | TCATGGTGGAGGTAGAGAACG          | TCATGGTGGAGGTAGAGAACG          |
| <i>HSP60</i>        | GTGGAAAAAGGAATCATTGACC         | GTAGTTAACAGAGAGGCCACACC        |
| <i>HSP70</i>        | CCCTCTTCGCCATCTCCT             | GCCCTCATCAACACAGAGAAG          |
| <i>P2X7</i>         | ACACCTTCCCTTTGCAGGGGAACT       | TCGATGGGGCACCAGGCAGA           |
| <i>TP53</i>         | ATGGCGACTGTCCAGCTTTG           | GACGCTAGGATCTGACTGCG           |
| <i>p15 (CDKN2A)</i> | GCGTTCACCTCCAATGTCTGCTG        | TCCACTTTGTCCTCAGTCTTCAGG       |
| <i>p21 (CDKN1A)</i> | CGAAGTCAGTTCCTTGTGGAG          | CATGGGTTCTGACGGACAT            |
